# Supplementary material
Source: publisher figshare collection journal article supplement (https://tandf.figshare.com/ndownloader/files/14514380)
Supplement: Supplementary file 1 [file 14514380]

Supporting Information

**Polyurethane Acrylate-supported rGO/TiO2 Electrical Conductive and Antibacterial Nanocomposites**

**
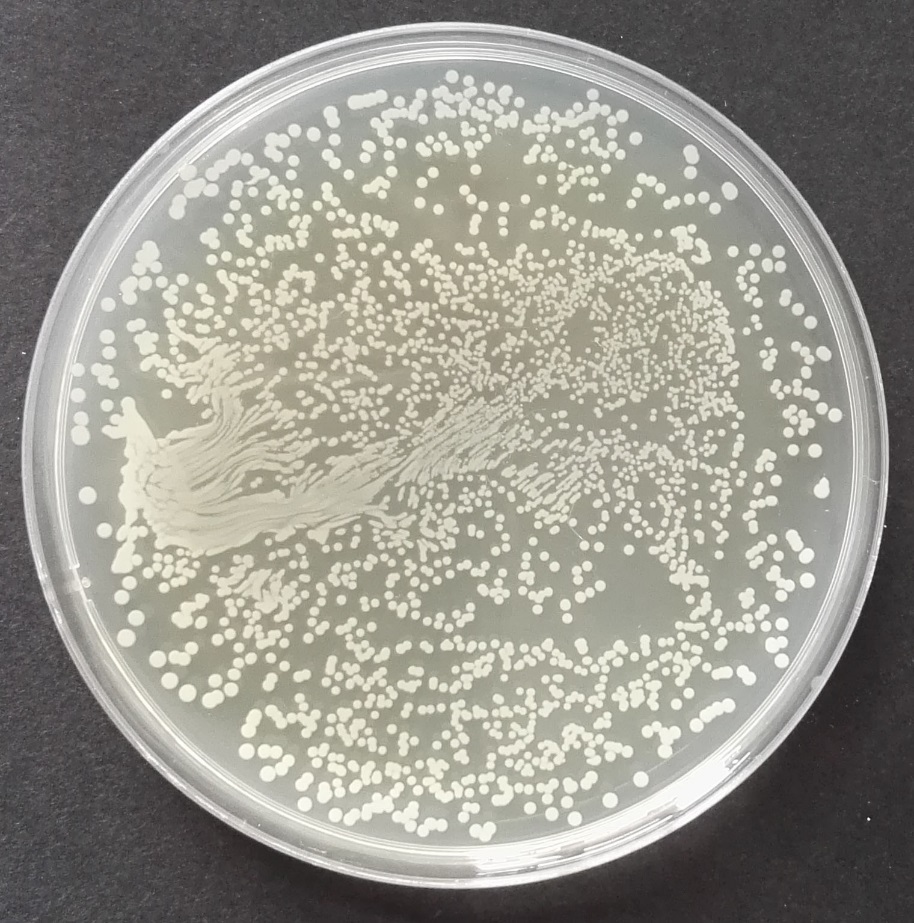
**

**Figure S1** The optical images of *S. aureus* incubated on agar plates after 150 min treated with PUA-Ag/TiO2 nanocomposite films under the experiment condition of visible light illumination.
